# Supplementary material for: Executability and repeatability of a study setup using wearable and computerized technology to examine a wide range of physiological and cognitive functions of a patient outside hospital
Source: bioRxiv or medRxiv preprint supplement (doi:10.1101/2023.01.30.23285187), 2023-02-01

**Executability and repeatability of a study setup using wearable and computerized technology to examine a wide range of physiological and cognitive functions of a patient outside hospital**

Kiti Müller et al.

**SUPPLEMENT 1**

*Flow chart of the patient selection process, outcome of recruitment and patient participation in the actual study.*

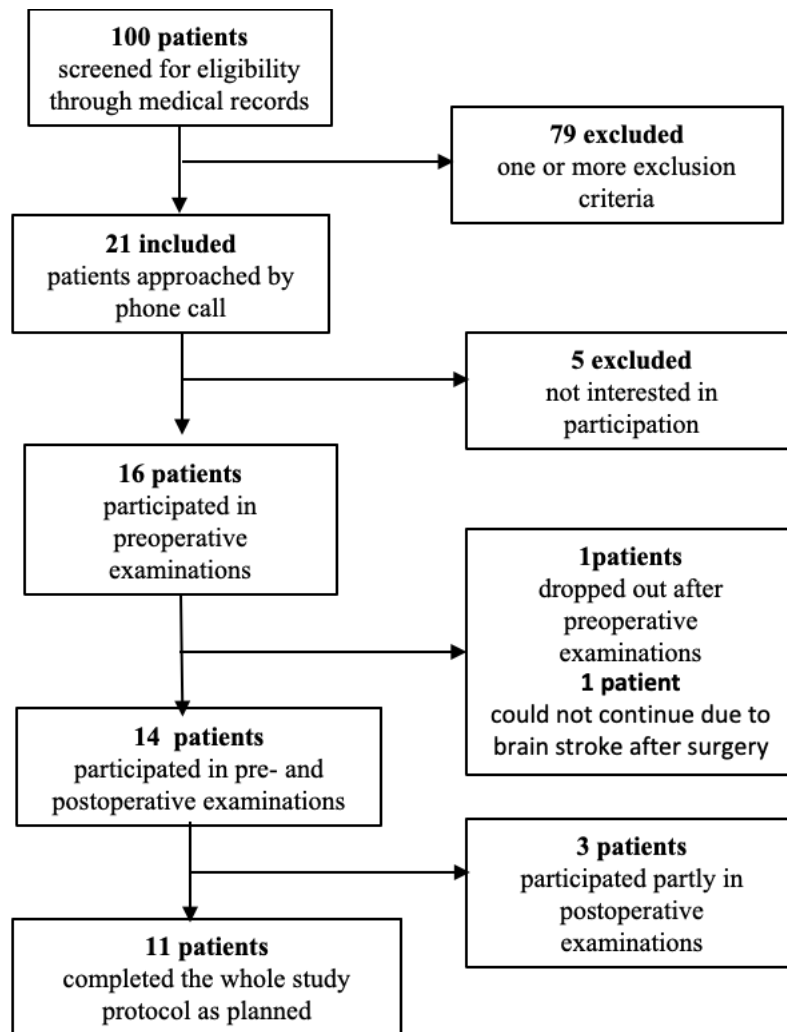

Supplement: Supplementary file [file media-1.pdf]
