# Supplementary material for: Executability and repeatability of a study setup using wearable and computerized technology to examine a wide range of physiological and cognitive functions of a patient outside hospital
Source: bioRxiv or medRxiv preprint supplement (doi:10.1101/2023.01.30.23285187), 2023-02-01
Supplement: Supplementary file [file media-2.pdf]

## Executability and repeatability of a study setup using wearable and computerized technology to examine a wide range of physiological and cognitive functions of a patient outside hospital

Kiti Müller et al.

### SUPPLEMENT 3: Clinical neuropsychological tests and subjective questionnaires

Table 1. Clinical neuropsychological test battery

| <b>Cognitive domain</b> | <b>Neuropsychological test</b>                                                                                                                           |
|-------------------------|----------------------------------------------------------------------------------------------------------------------------------------------------------|
| Processing speed        | WAIS-IV Coding [1]<br>Stroop test, colour-congruent [2]<br>FAT, perceptual motor speed [3,4]                                                             |
| Executive functions     | Stroop test, colour-incongruent [2]<br>Dual task [5]<br>Verbal fluency test, phonemic [2]<br>FAT, set shifting [3,4]                                     |
| Working memory          | WMS-III Letter-Number Sequencing [6]<br>WMS-III Digit Span [6]<br>FAT, visuospatial span [4]                                                             |
| Memory and learning     | WMS-III Word Lists [6]<br>WMS-III Logical Memory [6]<br>WMS-III Visual Reproduction [6]                                                                  |
| Visuospatial perception | WAIS-IV Block Design [1]<br>Visual search for parallel lines [7]                                                                                         |
| Verbal functions        | WAIS-IV Similarities [1]<br>Boston naming test [8]<br>Verbal fluency test, semantic [2]                                                                  |
| Questionnaires          | Checklist for cognitive and emotional consequences following stroke (CLCE-24) [9]<br>Cognitive Reserve Scale (CRS) [10]<br>Resilience Scale (RS-14) [11] |

Table 2. Subjective Questionnaires

Patients answered the following validated subjective questionnaires via an internet portal.

| <b>Questionnaires and references</b>                                                                                           | <b>Short description</b>                                                                                                                         |
|--------------------------------------------------------------------------------------------------------------------------------|--------------------------------------------------------------------------------------------------------------------------------------------------|
| Oslo Social Support Scale [12]                                                                                                 | Three-item scale used to determine the social support of individual's family, friends, and neighbours                                            |
| Alcohol Use Disorders Identification Test (AUDIT) [13]                                                                         | Widely used 10-item screening tool developed to evaluate individual's alcohol-related problems                                                   |
| WHO Alcohol, Smoking and Substance Involvement Screening Test (ASSIST) [13]                                                    | A brief screening tool used to discover the use of psychoactive substances                                                                       |
| International Physical Activity Questionnaire (IPAQ) [14]                                                                      | A brief questionnaire for assessing individual's health-related physical activity comprehensively and multidimensionally                         |
| Mediterranean Diet Score (MDS) [15]                                                                                            | Nine-item score to evaluate the healthiness of individual's diet habits                                                                          |
| Shirom-Melamed Burnout Measure (SMBM) [16]                                                                                     | Fourteen-item tool to evaluate individual's burnout level                                                                                        |
| Absenteeism and Presenteeism questions of the World Health Organization's Health and Work Performance Questionnaire (HPQ) [17] | Seven-item questionnaire extracted from WHO's HPQ. Describes individual's work performance and the number of sick leaves and other work absences |
| Perceived Stress Scale [18]                                                                                                    | Ten-item scale to describe stress experiences                                                                                                    |
| Mobile Modified Rankin Scale [19]                                                                                              | Mobile-based scale used to evaluate performance and independency mostly in stroke patients                                                       |
| Beck Depression Inventory (BDI) [20]                                                                                           | Widely used questionnaire to evaluate the level of depression symptoms                                                                           |
| Beck Anxiety Inventory (BAI) [21]                                                                                              | Widely used questionnaire to evaluate the level of anxiety symptoms                                                                              |
| Epworth Sleepiness Scale (ESS) [22]                                                                                            | Ten-item scale describing day-time sleepiness                                                                                                    |
| Basic Nordic Sleep Questionnaire (BNSQ) [23]                                                                                   | A questionnaire determining a wide range of sleep complaints                                                                                     |
| Fatigue Assessment Scale (FAS) [24]                                                                                            | Ten-item scale evaluating the levels of cognitive performance and fatigue                                                                        |
| EuroHis-8 [25]                                                                                                                 | Eight-item questionnaire to evaluate an individual's quality of life                                                                             |
| Checklist for Cognitive and Emotional consequences (CLCE-24) [9]                                                               | A screening tool to identify cognitive and emotional problems                                                                                    |
| Brain Work Questionnaire (BWQ) [26]                                                                                            | A comprehensive questionnaire evaluating cognitive demands at work and work-related cognitive strain                                             |

**Table 3.** Evaluation form filled after home recordings. Estimates are median values (0-10) with interquartile range (IQR). The items of “Number of tests” and “Number of questionnaires” are graded from 0 = too many to 10 = too few and 5 represents not too many or too few. Otherwise, the higher the value the easier or more positive experience. (N= number of patients answering.)

| <b>Evaluation about the study protocol</b> | <b>Preoperatively (N=8)</b> | <b>1<sup>st</sup> postoperatively (N=11)</b> | <b>2<sup>nd</sup> postoperatively (N=11)</b> |
|--------------------------------------------|-----------------------------|----------------------------------------------|----------------------------------------------|
| Mental demand                              | 7.5 (7-10)                  | 10 (4-10)                                    | 6 (4-8)                                      |
| Physical demand                            | 8.5 (7-10)                  | 9 (6-10)                                     | 6 (5-9)                                      |
| Effort                                     | 7 (4-8.5)                   | 9 (4-10)                                     | 6 (5-8)                                      |
| Frustration                                | 8.5 (7-9.5)                 | 10 (4-10)                                    | 5 (4-10)                                     |
| Saliva samples                             | 10 (9-10)                   | 10 (10-10)                                   | 10 (5-10)                                    |
| Sleep diary                                | 10 (8.5)                    | 10 (10-10)                                   | 10 (8-10)                                    |
| Cognitive tablet tests                     | 9 (5-10)                    | 10 (8-10)                                    | 9.5 (9-10)                                   |
| Physiological measurements                 | 9.5 (9-10)                  | 10 (10-10)                                   | 10 (8-10)                                    |
| Instructions                               |                             |                                              |                                              |
| • Sufficiency                              | 10 (9.5-10)                 | 10 (9-10)                                    | 10 (10-10)                                   |
| • Clearness                                | 10 (10-10)                  | 10 (9-10)                                    | 10 (9-10)                                    |
| Opportunity to ask help                    | 10 (8-10)                   | 10 (10-10)                                   | 10 (10-10)                                   |
| Number of tests                            | 5 (4-5)                     | 5 (5-5)                                      | 5 (3-5)                                      |
| Number of questionnaires                   | 4.5 (3.5-5)                 | 5 (4-5)                                      | 5 (2-5)                                      |
| Re-participation                           | 10 (8-10)                   | 10 (6-10)                                    | 10 (5-10)                                    |

## References

- 1 Wechsler D. *WAIS-IV: Wechsler adult intelligence scale*. San Antonio, Tex.: : Pearson 2008.
- 2 Lezak MD, Howieson, Diane B., Bigler Erin D., *et al.*, editors. *Neuropsychological assessment*. 5th ed. Oxford ; New York: : Oxford University Press 2012.
- 3 Reitan RM. Validity of the Trail Making Test as an Indicator of Organic Brain Damage. *Perceptual and Motor Skills* 1958;**8**:271–6. doi:10.2466/pms.1958.8.3.271
- 4 Kessels RP, van Zandvoort MJ, Postma A, *et al.* The Corsi Block-Tapping Task: standardization and normative data. *Appl Neuropsychol* 2000;**7**:252–8. doi:10.1207/S15324826AN0704\_8
- 5 Vilkki J, Virtanen S, Surma-Aho O, *et al.* Dual task performance after focal cerebral lesions and closed head injuries. *Neuropsychologia* 1996;**34**:1051–6. doi:10.1016/0028-3932(96)00028-0

- 6 Wechsler D. Wechsler Adult Intelligence Scale--Third Edition. 2019. doi:10.1037/t49755-000
- 7 Vilkki J. Hemi-inattention in visual search for parallel lines after focal cerebral lesions. *J Clin Exp Neuropsychol* 1989;**11**:319–31. doi:10.1080/01688638908400892
- 8 Laine M, Goodglass H, Niemi J, *et al.* Adaptation of the Boston Diagnostic Aphasia Examination and the Boston Naming Test into Finnish. *Scandinavian Journal of Logopedics and Phoniatics* 1993;**18**:83–92. doi:10.3109/14015439309101353
- 9 van Heugten C, Rasquin S, Winkens I, *et al.* Checklist for cognitive and emotional consequences following stroke (CLCE-24): development, usability and quality of the self-report version. *Clin Neurol Neurosurg* 2007;**109**:257–62. doi:10.1016/j.clineuro.2006.10.002
- 10 León I, García-García J, Roldán-Tapia L. Estimating cognitive reserve in healthy adults using the Cognitive Reserve Scale. *PLoS One* 2014;**9**:e102632. doi:10.1371/journal.pone.0102632
- 11 Losoi H, Turunen S, Wäljas M, *et al.* Psychometric Properties of the Finnish Version of the Resilience Scale and its Short Version. *PCH* 2013;**2**:1–10. doi:10.5964/pch.v2i1.40
- 12 Kocalevent R-D, Berg L, Beutel ME, *et al.* Social support in the general population: standardization of the Oslo social support scale (OSSS-3). *BMC Psychol* 2018;**6**:31. doi:10.1186/s40359-018-0249-9
- 13 Saunders JB, Aasland OG, Babor TF, *et al.* Development of the Alcohol Use Disorders Identification Test (AUDIT): WHO Collaborative Project on Early Detection of Persons with Harmful Alcohol Consumption-II. *Addiction* 1993;**88**:791–804. doi:10.1111/j.1360-0443.1993.tb02093.x
- 14 Booth M. Assessment of Physical Activity: An International Perspective. *Research Quarterly for Exercise and Sport* 2000;**71**:114–20. doi:10.1080/02701367.2000.11082794
- 15 Trichopoulou A, Kouris-Blazos A, Wahlqvist ML, *et al.* Diet and overall survival in elderly people. *BMJ* 1995;**311**:1457–60. doi:10.1136/bmj.311.7018.1457
- 16 Gerber M, Colledge F, Mücke M, *et al.* Psychometric properties of the Shirom-Melamed Burnout Measure (SMBM) among adolescents: results from three cross-sectional studies. *BMC Psychiatry* 2018;**18**:266. doi:10.1186/s12888-018-1841-5
- 17 Kessler RC, Barber C, Beck A, *et al.* The World Health Organization Health and Work Performance Questionnaire (HPQ): *Journal of Occupational and Environmental Medicine* 2003;**45**:156–74. doi:10.1097/01.jom.0000052967.43131.51
- 18 Cohen S, Kamarck T, Mermelstein R. A global measure of perceived stress. *J Health Soc Behav* 1983;**24**:385–96.
- 19 van Swieten JC, Koudstaal PJ, Visser MC, *et al.* Interobserver agreement for the assessment of handicap in stroke patients. *Stroke* 1988;**19**:604–7. doi:10.1161/01.str.19.5.604
- 20 Beck AT, Ward CH, Mendelson M, *et al.* An inventory for measuring depression. *Arch Gen Psychiatry* 1961;**4**:561–71. doi:10.1001/archpsyc.1961.01710120031004

- 21 Beck AT, Epstein N, Brown G, *et al.* An inventory for measuring clinical anxiety: Psychometric properties. *Journal of Consulting and Clinical Psychology* 1988;**56**:893–7. doi:10.1037/0022-006X.56.6.893
- 22 Johns MW. A new method for measuring daytime sleepiness: the Epworth sleepiness scale. *Sleep* 1991;**14**:540–5. doi:10.1093/sleep/14.6.540
- 23 Partinen null, Gislason null. Basic Nordic Sleep Questionnaire (BNSQ): a quantitated measure of subjective sleep complaints. *J Sleep Res* 1995;**4**:150–5. doi:10.1111/j.1365-2869.1995.tb00205.x
- 24 Michielsen HJ, De Vries J, Van Heck GL. Psychometric qualities of a brief self-rated fatigue measure: The Fatigue Assessment Scale. *J Psychosom Res* 2003;**54**:345–52. doi:10.1016/s0022-3999(02)00392-6
- 25 da Rocha NS, Power MJ, Bushnell DM, *et al.* The EUROHIS-QOL 8-item index: comparative psychometric properties to its parent WHOQOL-BREF. *Value Health* 2012;**15**:449–57. doi:10.1016/j.jval.2011.11.035
- 26 Kalakoski V, Selinheimo S, Valtonen T, *et al.* Effects of a cognitive ergonomics workplace intervention (CogErg) on cognitive strain and well-being: a cluster-randomized controlled trial. A study protocol. *BMC Psychol* 2020;**8**:1. doi:10.1186/s40359-019-0349-1
